# Supplementary material
Source: publisher figshare collection journal article supplement (https://future-science-group.figshare.com/articles/dataset/_/16988260)

## Supplementary Figure 2

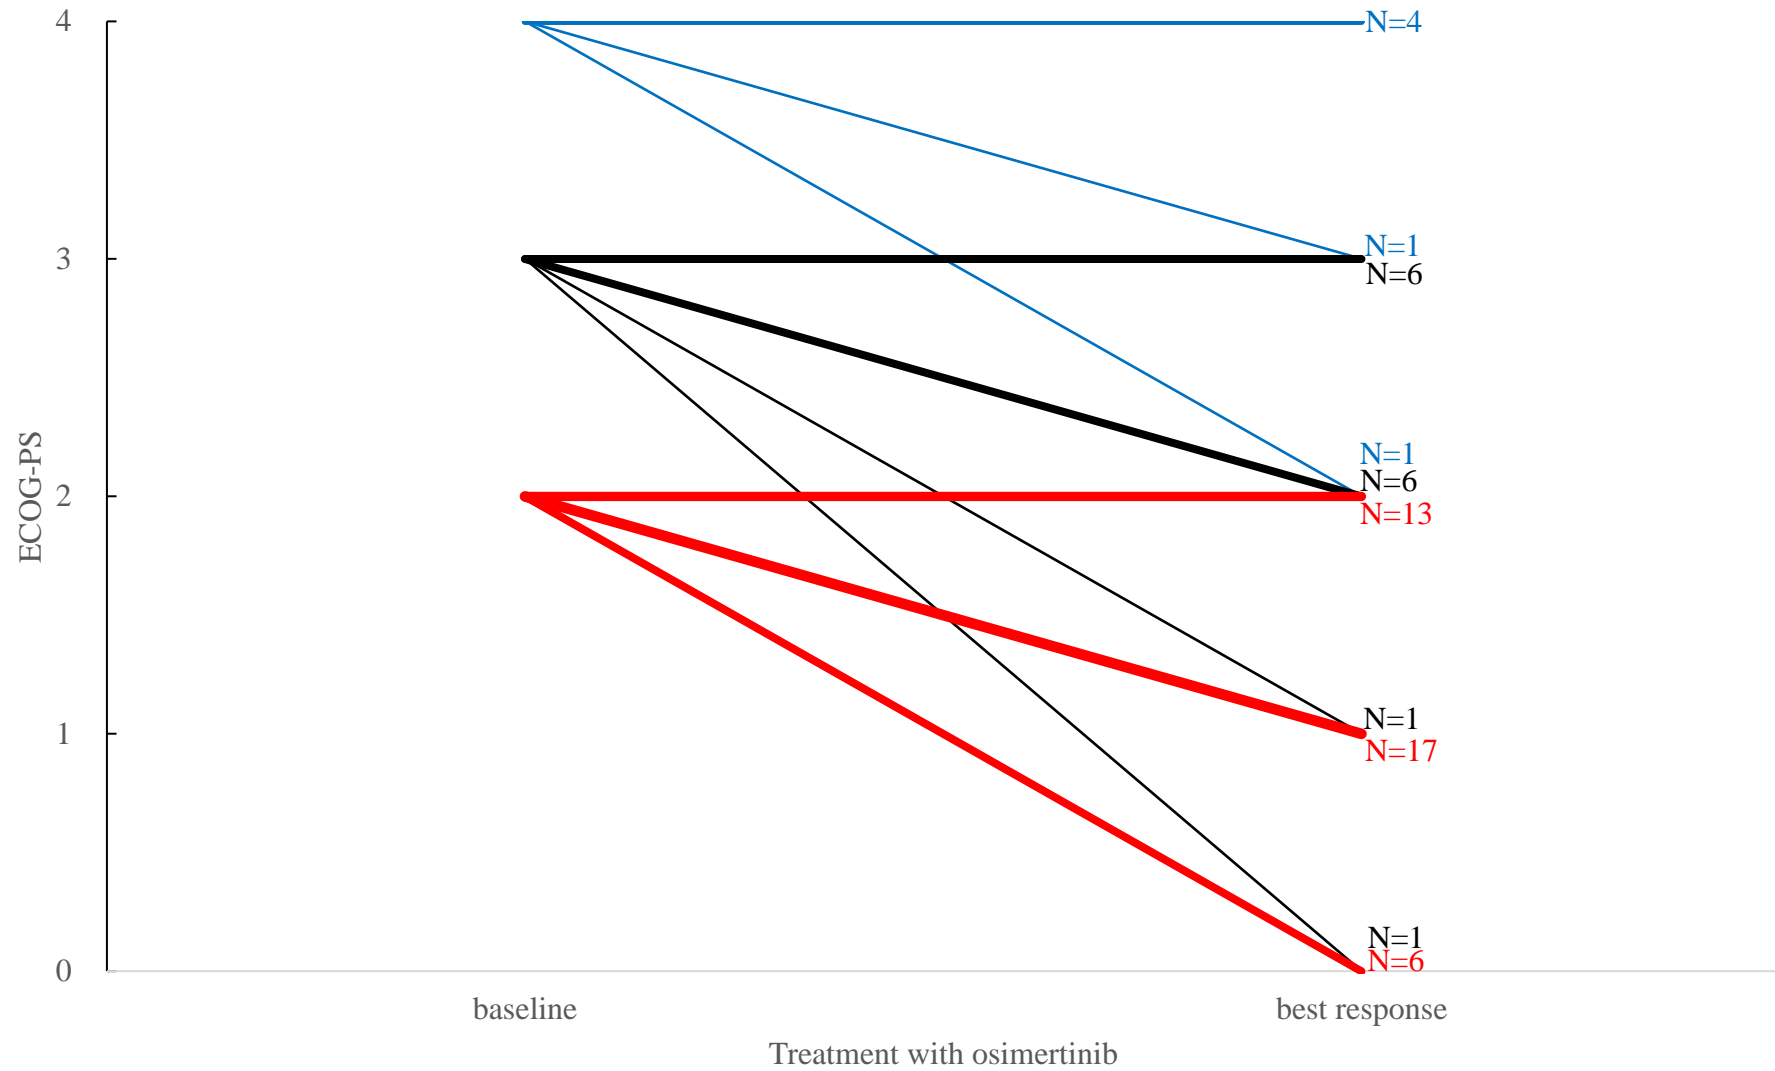

Supplement: Supplementary file 1 [file 1]

Supplementary Figure 1

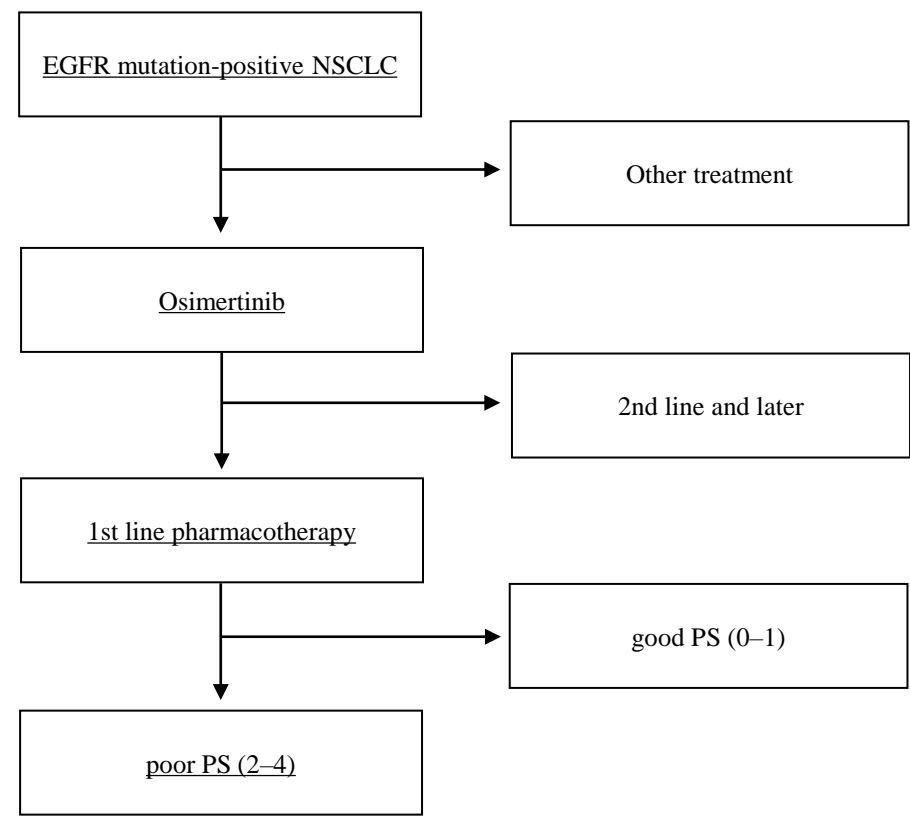

Supplement: Supplementary file 2 [file 1]
